# Supplementary material
Source: publisher site journal article supplement (https://www.dovepress.com/article/364303)
Supplement: Supplementary file 1 [file get_supplementary_file.php]

**Supplement Table 1.** Univariable and Multivariable Cox Proportional Hazards Regression Analyses for PFS and OS of the first-line therapy subgroup.

|  | **PFS** | | | | | | **OS** | | | | | | |
| --- | --- | --- | --- | --- | --- | --- | --- | --- | --- | --- | --- | --- | --- |
|  | **Univariable** | | | **Multivariable** | | | **Univariable** | | | **Multivariable** | | | |
| **Variables** | **HR** | **95% CI** | **P-values** | **HR** | **95% CI** | **P-values** | **HR** | **95% CI** | **P-values** | **HR** | **95% CI** | **P-values** |
| **Age** | 1.01 | (0.99, 1.02) | 0.452 |  |  |  | 1.01 | (1.00, 1.03) | 0.153 |  |  |  |
| **Gender** |  |  |  |  |  |  |  |  |  |  |  |  |
| Male | 1.00 |  |  |  |  |  | 1.00 |  |  |  |  |  |
| Female | 1.01 | (0.74, 1.37) | 0.956 |  |  |  | 1.03 | (0.73, 1.45) | 0.869 |  |  |  |
| **ECOG PS** |  |  |  |  |  |  |  |  |  |  |  |  |
| 0 | 1.00 |  |  |  |  |  | 1.00 |  |  |  |  |  |
| 1-2 | 1.31 | (0.92, 1.87) | 0.129 |  |  |  | 1.56 | (1.07, 2.28) | 0.022 | 1.64 | (1.04, 2.57) | 0.033 |
| **HBV** |  |  |  |  |  |  |  |  |  |  |  |  |
| Negative | 1.00 |  | 0.182 |  |  |  | 1.00 |  | 0.259 |  |  |  |
| Positive | 0.804 | (0.53,1.23 | 0.314 |  |  |  | 0.688 | (0.24,1.99) | 0.490 |  |  |  |
| Missing | 1.873 | (0.65,5.37) | 0.243 |  |  |  | 0.521 | (0.19,1.44) | 0.208 |  |  |  |
| **Primary tumor location** |  |  |  |  |  |  |  |  |  |  |  |  |
| ICC | 1.00 |  |  |  |  |  | 1.00 |  |  |  |  |  |
| Others | 1.27 | (0.91, 1.76) | 0.156 |  |  |  | 1.06 | (0.74, 1.53) | 0.753 |  |  |  |
| **Differentiation** |  |  |  |  |  |  |  |  |  |  |  |  |
| Well differentiated | 1.00 |  | 0.140 | 1.00 |  | 0.345 | 1.00 |  | 0.438 |  |  |  |
| Moderately differentiated | 0.350 | (0.12,1.02) | 0.054 | 0.345 | (0.12,1.03) | 0.057 | 0.813 | (0.26,2.52) | 0.719 |  |  |  |
| Low / moderately differentiation | 0.493 | (0.18,1.38) | 0.179 | 0.057 | (0.16,1.24) | 0.119 | 1.157 | (0.39,3.45) | 0.794 |  |  |  |
| Undifferentiated | 0.491 | (0.16,1.55) | 0.224 | 0.119 | (0.12,1.21) | 0.100 | 1.132 | (0.34,3.77) | 0.840 |  |  |  |
| Missing | 0.327 | (0.112,0.96) | 0.042 | 0.100 | (0.12,1.04) | 0.058 | 0.746 | (0.24,2.33) | 0.615 |  |  |  |
| **Metastatic organs** |  |  |  |  |  |  |  |  |  |  |  |  |
| No metastasis | 1.00 |  |  |  |  |  | 1.00 |  |  |  |  |  |
| Intrahepatic metastasis | 0.88 | (0.41, 1.88) | 0.739 |  |  |  | 1.05 | (0.44, 2.51) | 0.911 |  |  |  |
| Intrahepatic and other organs metastasis | 1.16 | (0.63, 2.12) | 0.633 |  |  |  | 1.07 | (0.53, 2.16) | 0.851 |  |  |  |
| Other organs metastasis | 0.89 | (0.48, 1.66) | 0.722 |  |  |  | 1.04 | (0.51, 2.11) | 0.918 |  |  |  |
| **Number of metastatic** **organs** |  |  |  |  |  |  |  |  |  |  |  |  |
| 0 | 1.00 |  |  |  |  |  |  |  |  |  |  |  |
| 1 | 1.00 | (0.54, 1.85) | 0.992 |  |  |  | 1.11 | (0.54, 2.27) | 0.771 |  |  |  |
| 2 | 1.03 | (0.55, 1.92) | 0.930 |  |  |  | 0.91 | (0.44, 1.89) | 0.808 |  |  |  |
| 3 | 0.90 | (0.46, 1.75) | 0.762 |  |  |  | 1.05 | (0.49, 2.23) | 0.903 |  |  |  |
| 4 | 2.02 | (0.85, 4.82) | 0.111 |  |  |  | 2.35 | (0.90, 6.15) | 0.081 |  |  |  |
| **The first-line therapy subgroup** |  |  |  |  |  |  |  |  |  |  |  |  |
| First-line chemotherapy | 1.00 |  |  | 1 |  |  | 1 |  |  |  |  |  |
| First-line PD-1-mAb combined anti-angiogenesisTKI | 0.45 | (0.27, 0.74) | 0.02 | 0.468 | (0.28,0.79) | 0.005 | 0.65 | (0.36, 1.18) | 0.156 | 0.71 | (0.39, 1.29) | 0.257 |
| First-line PD-1-mAb combined chemotherapy | 0.72 | (0.46, 1.13) | 0.155 | 0.756 | (0.47,1.21) | 0.24 | 0.53 | (031, 0.92) | 0.023 | 0.55 | (0.32, 0.96) | 0.034 |

Notes: P-value < 0.05 is statistically significant in both univariate and multivariate analyses.

Abbreviations: PFS, disease-free survival; OS, overall survival; HR, hazard rate; CI, confidence interval; ECOG PS, eastern cooperative oncology group performance status; PD-1-mAb, programmed cell death-1 monoclonal antibody; HBV, hepatitis B virus; ICC, Intrahepatic cholangiocarcinoma.

**Supplement Table 2.** Patient clinicopathological characteristics of the second-line therapy subgroups.

|  | **Total** | **Second-line PD-1-mAb +anti-angiogenesis TKI** | **Second-line PD-1-mAb +chemotherapy** | **Second-line chemotherapy** | **P-values** |
| --- | --- | --- | --- | --- | --- |
| **Age** |  |  |  |  | 0.343 |
| Median (Range) | 55.00(29.00, 88.00) | 52.50(29.00, 88.00) | 54.50(29.00, 70.00) | 57.00(37.00, 76.00) |  |
| **Gender (n, %)** |  |  |  |  | 0.819 |
| Male | 55 (67.90) | 14 (63.64) | 12 (66.67) | 29 (70.73) |  |
| Female | 26 (32.10) | 8 (36.36) | 6 (33.33) | 12 (29.27) |  |
| **ECOG PS (n, %)** |  |  |  |  | 0.188 |
| 0 | 60 (74.07) | 13 (59.09) | 14 (77.78) | 33 (80.49) |  |
| 1-2 | 21 (25.93) | 9 (40.91) | 4 (22.22) | 8 (19.51) |  |
| **HBV** |  |  |  |  | 0.292 |
| Negative | 54 (66.67) | 12 (54.55) | 14 (77.78) | 28 (68.29) |  |
| Positive | 25 (30.86) | 10 (45.45) | 4 (22.22) | 11 (26.83) |  |
| Missing | 2(2.47) | 0(0.0) | 0(0.0) | 2(4.88) |  |
| **Primary tumor location** |  |  |  |  | 0.857 |
| ICC | 56 (69.14) | 16 (72.73) | 13 (72.22) | 27 (65.85) |  |
| Others | 25 (30.86) | 6 (27.27) | 5 (27.78) | 14 (34.15) |  |
| **Differentiation** |  |  |  |  | 0.147 |
| Well differentiated | 1 (0.94) | 0 (0.00) | 0 (0.00) | 1 (2.44) |  |
| Moderately differentiated | 24 (22.64) | 7 (31.82) | 5 (27.78) | 12 (29.27) |  |
| Low / moderately differentiation | 34 (32.08) | 11 (50.0) | 6 (33.33) | 17 (41.46) |  |
| Undifferentiated | 6 (5.66) | 0 (0.00) | 0 (0.00) | 6 (14.63) |  |
| Missing | 26(24.52) | 4(18.18) | 7(38.89) | 15(36.59) |  |
| **Metastatic organs** |  |  |  |  | 0.140 |
| No metastasis | 3 (3.70) | 0 (0.00) | 1 (5.56) |  |  |
| Intrahepatic metastasis | 9 (11.11) | 3 (13.64) | 0 (0.00) |  |  |
| Intrahepatic and other organs metastasis | 36 (44.44) | 11 (50.00) | 5 (27.78) |  |  |
| Other organs metastasis | 33 (40.74) | 8 (36.36) | 12 (66.67) |  |  |
| **Number of metastatic organs** |  |  |  |  | 0.226 |
| 0 | 3 (3.70) | 0 (0.00) | 1 (5.56) | 2 (4.88) |  |
| 1 | 28 (34.57) | 6 (27.27) | 8 (44.44) | 14 (34.15) |  |
| 2 | 26 (32.10) | 7 (31.82) | 4 (22.22) | 15 (36.59) |  |
| 3 | 21 (25.93) | 7 (31.82) | 5 (27.78) | 9 (21.95) |  |

Notes: values are presented as the median (range) or n (%).

Abbreviations: PD-1-mAb, programmed cell death-1 monoclonal antibody; ECOG PS, eastern cooperative oncology group performance status; TKI, tyrosine kinase inhibitor ; HBV , hepatitis B virus; ICC, Intrahepatic cholangiocarcinoma.

**Supplement Table 3.** Univariable and Multivariable Cox Proportional Hazards regression Analyses for PFS and OS of the second-line therapy subgroup.

|  | **PFS** | | | | | | **OS** | | | | | | |
| --- | --- | --- | --- | --- | --- | --- | --- | --- | --- | --- | --- | --- | --- |
|  | **Univariable** | | | **Multivariable** | | | **Univariable** | | | | **Multivariable** | | |
| **Variables** | **HR** | **95% CI** | **P-values** | **HR** | **95% CI** | **P-values** | **HR** | **95% CI** | **P-values** | | **HR** | **95% CI** | **P-values** |
| Age | 1.00 | (0.98, 1.02) | 0.732 |  |  |  | 1.01 | (0.99, 1.03) | | 0.257 |  |  |  |
| **Gender** |  |  |  |  |  |  |  |  | |  |  |  |  |
| Male | 1.00 |  |  |  |  |  | 1.00 |  | |  |  |  |  |
| Female | 1.31 | (0.86, 2.01) | 0.206 |  |  |  | 0.87 | (0.54, 1.38) | | 0.545 |  |  |  |
| **ECOG PS** |  |  |  |  |  |  |  |  | |  |  |  |  |
| 0 | 1.00 |  |  |  |  |  | 1.00 |  | |  |  |  |  |
| 1-2 | 1.17 | (0.73, 1.87) | 0.508 |  |  |  | 1.32 | (0.80, 2.15) | | 0.275 |  |  |  |
| **HBV** |  |  |  |  |  |  |  |  | |  |  |  |  |
| Negative | 1.00 |  | 0.984 |  |  |  | 1.00 |  | | 0.829 |  |  |  |
| Positive | 1.00 | (0.59,1.67) | 0.985 |  |  |  | 0.87 | (0.50, 1.49) | | 0.604 |  |  |  |
| Missing | 1.13 | (0.27,4.84) | 0.865 |  |  |  | 1.15 | (0.27, 4.98) | | 0.850 |  |  |  |
| **Primary tumor location** |  |  |  |  |  |  |  |  | |  |  |  |  |
| ICC | 1.00 |  |  |  |  |  | 1.00 |  | |  |  |  |  |
| Others | 1.10 | (0.69, 1.74) | 0.685 |  |  |  | 0.81 | (0.49, 1.34) | | 0.407 |  |  |  |
| **Differentiation** |  |  |  |  |  |  |  |  | |  |  |  |  |
| Well differentiated | 1.00 |  | 0.224 |  |  |  | 1.00 |  | | 0.529 |  |  |  |
| Moderately differentiated | 2.32 | (0.30,17.7) | 0.417 |  |  |  | 210 | (0.27,16.31) | | 0.480 |  |  |  |
| Low / moderately differentiation | 3.33 | (0.44,25.18) | 0.244 |  |  |  | 2.87 | (0.38,22.03) | | 0.310 |  |  |  |
| Undifferentiated | 3.35 | (0.39,28.93) | 0.273 |  |  |  | 3.37 | (0.39,29.36) | | 0.271 |  |  |  |
| Missing | 1.60 | (0.2,12.58) | 0.658 |  |  |  | 3.48 | (0.44,27.52) | | 0.237 |  |  |  |
| **Metastatic organs** |  |  |  |  |  |  |  |  | |  |  |  |  |
| No metastasis | 1.00 |  |  |  |  |  | 1.00 |  | |  |  |  |  |
| Intrahepatic metastasis | 1.01 | (0.29, 3.46) | 0.991 |  |  |  | 1.69 | (0.43, 6.65) | | 0.451 |  |  |  |
| Intrahepatic and other organs metastasis | 1.42 | (0.51, 3.97) | 0.506 |  |  |  | 1.56 | (0.47, 5.11) | | 0.464 |  |  |  |
| Other organs metastasis | 1.08 | (0.39, 3.05) | 0.878 |  |  |  | 1.62 | (0.49, 5.32) | | 0.429 |  |  |  |
| **Number of metastatic** **organs** |  |  |  |  |  |  |  |  | |  |  |  |  |
| 0 | 1.00 |  |  |  |  |  | 1.00 |  | |  |  |  |  |
| 1 | 1.14 | (0.40, 3.22) | 0.805  0.805  22 | 1.91 | （0.56，6.52） | 0.30 | 1.63 | (0.49, 5.38) | | 0.425 |  |  |  |
| 2 | 1.05 | (0.37, 3.03) | 0.923 | 1.64 | （0.48，5.65） | 0.43 | 1.37 | (0.41, 4.62) | | 0.608 |  |  |  |
| 3 | 1.49 | (0.51, 4.34) | 0.466 | 2.68 | （0.75，9.56） | 0.13 | 1.76 | (0.51, 6.02) | | 0.371 |  |  |  |
| 4 | 3.73 | (0.98, 14.15) | 0.053 | 16.6 | （2.8, 98.4) | 0.002 | 3.08 | (0.68, 14.06) | | 0.146 |  |  |  |
| **The second-line therapy subgroup** |  |  |  |  |  |  |  |  | |  |  |  |  |
| Second-line chemotherapy | 1.00 |  |  |  |  |  | 1.00 |  | |  |  |  |  |
| Second-line PD-1-mAb combined anti-angiogenesis TKI group | 0.45 | (0.25, 0.82) | 0.009 | 0.32 | (0.16,0.62) | 0.001 | 0.62 | (0.33, 1.17) | | 0.140 |  |  |  |
| Second-line PD-1-mAb combined chemotherapy group | 0.54 | (0.30, 0.98) | 0.044 | 0.49 | (0.25,0.92) | 0.028 | 0.82 | (0.42, 1.60) | | 0.561 |  |  |  |

Notes: P-value < 0.05 is statistically significant in both univariate and multivariate analyses.

Abbreviations: PFS, disease-free survival; OS, overall survival; HR, hazard rate; CI, confidence interval; ECOG PS, eastern cooperative oncology group performance status; PD-1-mAb, programmed cell death-1 monoclonal antibody; HBV, hepatitis B virus; ICC, Intrahepatic cholangiocarcinoma.
